# Supplementary material
Source: publisher site journal article supplement (https://www.spandidos-publications.com/8642/downloadSupplementary)

Figure S1. Effects of the BMFM on cell viability in CVECs. (A) Cell viability of CVECs treated with varying concentrations of BMFM (20-1,280  $\mu\text{g/ml}$ ). (B) Cell viability of CVECs treated with BMFM (160, 320 and 640  $\mu\text{g/ml}$ ) in the presence of DOX (0.2  $\mu\text{mol/l}$ ). Cell viability assays were performed with at least six replicates per group. Data are presented as the mean values with error bars representing SD. \* $P < 0.05$  and \*\*\* $P < 0.001$ . BMFM, non-fermented blank matrix; CVEC, canine vascular endothelial cell; DOX, doxorubicin.

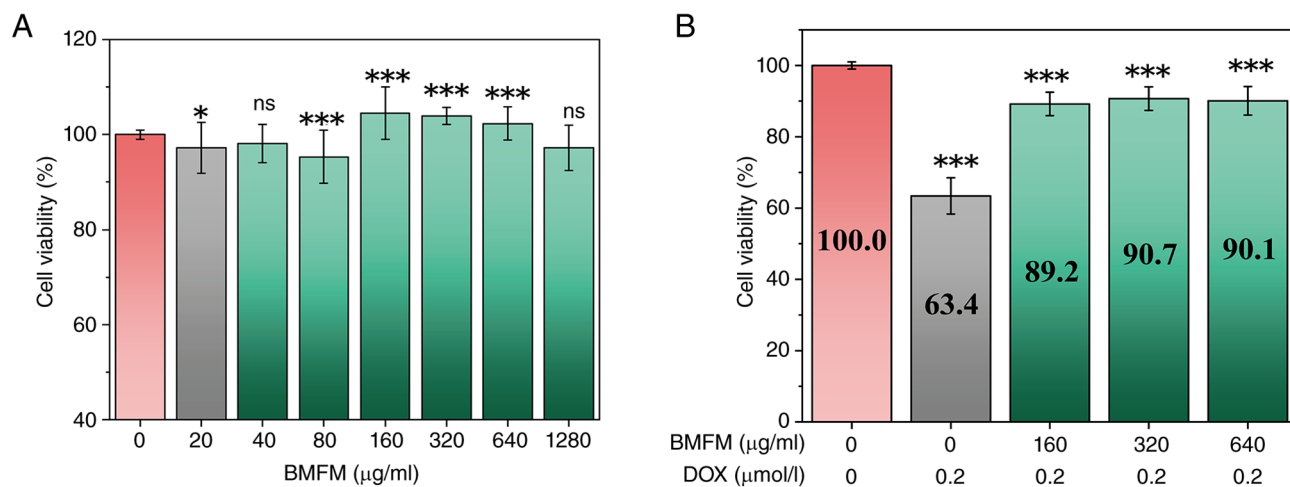

Supplement: Supplementary file 1 [file downloadSupplementary]
